# Supplementary material
Source: PubMed Central journal article supplement (PMC4113030)
Supplement: NIHMS491976-supplement-supplement_1.pdf [file NIHMS491976-supplement-supplement_1.pdf]

**Table 1.**

Whole brain white matter parcellated into 50 white matter regions based on the ICBM young adult DTI-81 atlas (\* indicates tracts that are present in both left and right hemispheres)

|       |                                      |        |                                          |
|-------|--------------------------------------|--------|------------------------------------------|
| MCP   | Middle cerebellar peduncle           | BCC    | Body of corpus callosum                  |
| PCT   | Pontine crossing tract               | SCC    | Splenium of corpus callosum              |
| ICP*  | Inferior cerebellar peduncle         | GCC    | Genu of corpus callosum                  |
| SCP*  | Superior cerebellar peduncle         | ACR*   | Anterior corona radiata                  |
| CST*  | Corticospinal tract                  | ML*    | Medial lemniscus                         |
| PCR*  | Posterior corona radiata             | PTR*   | Posterior thalamic radiation             |
| SS*   | Sagittal stratum                     | FX     | Fornix                                   |
| UNC*  | Uncinate fasciculus                  | TAP*   | Tapetum                                  |
| CP*   | Cerebral peduncle                    | EC*    | External capsule                         |
| ALIC* | Anterior limb of internal capsule    | RLIC*  | Retrolenticular part of internal capsule |
| PLIC* | Posterior limb of internal capsule   | FX/ST* | Fornix / Stria terminalis                |
| CGH*  | Cingulum (hippocampus part)          | SLF*   | Superior longitudinal fasciculus         |
| IFO*  | Inferior fronto-occipital fasciculus | SFO*   | Superior fronto-occipital fasciculus     |
| SCR*  | Superior corona radiata              | CGC*   | Cingulum (cingulate gyrus part)          |

**Table 2.**

Thirty-four Freesurfer-derived cortical labels per hemisphere extracted as the basis for our 68x68 cortical connectivity matrices used in the inter-hemispheric integration analysis (note that these do not include the additional 19 Freesurfer-derived subcortical gray matter regions).

|    |                                       |    |                            |
|----|---------------------------------------|----|----------------------------|
| 1  | Banks of the superior temporal sulcus | 18 | Pars orbitalis             |
| 2  | Caudal anterior cingulate             | 19 | Pars triangularis          |
| 3  | Caudal middle frontal                 | 20 | Peri-calcarine             |
| 4  | Cuneus                                | 21 | Postcentral                |
| 5  | Entorhinal                            | 22 | Posterior cingulate        |
| 6  | Fusiform                              | 23 | Pre-central                |
| 7  | Inferior parietal                     | 24 | Precuneus                  |
| 8  | Inferior temporal                     | 25 | Rostral anterior cingulate |
| 9  | Isthmus of the cingulate              | 26 | Rostral middle frontal     |
| 10 | Lateral occipital                     | 27 | Superior frontal           |
| 11 | Lateral orbitofrontal                 | 28 | Superior parietal          |
| 12 | Lingual                               | 29 | Superior temporal          |
| 13 | Medial orbitofrontal                  | 30 | Supra-marginal             |
| 14 | Middle temporal                       | 31 | Frontal pole               |
| 15 | Parahippocampal                       | 32 | Temporal pole              |
| 16 | Paracentral                           | 33 | Transverse temporal        |
| 17 | Pars opercularis                      | 34 | Insula                     |

Table 3. Mean and standard deviation (SD) of global network metrics for the bipolar and healthy control subjects in this study (element-wise inverse mapping was used to calculate the characteristic path length and global efficiency)

|                                                                                  |                  | <b>Value</b>    | <b>F</b> | <b>df</b> | <b>P</b> |
|----------------------------------------------------------------------------------|------------------|-----------------|----------|-----------|----------|
| <b>Clustering coefficient</b>                                                    |                  |                 |          |           |          |
|                                                                                  | Bipolar          | 11.82 ± (1.100) |          |           |          |
|                                                                                  | Healthy controls | 12.59 ± (1.507) |          |           |          |
|                                                                                  |                  |                 | 11.0     | 1,44      | 0.002    |
| <b>Characteristic path Length (using element-wise inverse mapping, see text)</b> |                  |                 |          |           |          |
|                                                                                  | Bipolar          | 0.061 ± (0.013) |          |           |          |
|                                                                                  | Healthy controls | 0.055 ± (0.011) |          |           |          |
|                                                                                  |                  |                 | 6.57     | 1,44      | 0.014    |
| <b>Degree</b>                                                                    |                  |                 |          |           |          |
|                                                                                  | Bipolar          | 18.77 ± (1.324) |          |           |          |
|                                                                                  | Healthy controls | 19.07 ± (1.197) |          |           |          |
|                                                                                  |                  |                 | 1.31     | 1,44      | 0.258    |
| <b>Eglobal (using element-wise inverse mapping)</b>                              |                  |                 |          |           |          |
|                                                                                  | Bipolar          | 33.03 ± (3.827) |          |           |          |
|                                                                                  | Healthy controls | 36.05 ± (4.496) |          |           |          |
|                                                                                  |                  |                 | 14.9     | 1,44      | <0.001   |

Table 4. Mean and standard deviation (SD) of local node-level network metrics for the 20 fronto-limbic ROIs (10 in each hemisphere) proposed in our a priori hypotheses. Only regions exhibiting significant group differences at  $p=0.05$  (uncorrected) are shown (the element-wise inverse mapping was used to generate node-level path length).

|                                       |  | <b>Clustering</b>  |                 |           |          |
|---------------------------------------|--|--------------------|-----------------|-----------|----------|
|                                       |  | <b>Coefficient</b> | <b>F</b>        | <b>df</b> | <b>P</b> |
| <b>Hippocampus, left</b>              |  | Bipolar            | 6.37 ± (1.288)  |           |          |
|                                       |  | Healthy controls   | 7.54 ± (1.885)  |           |          |
|                                       |  |                    | 8.10            | 1,44      | 0.007    |
| <b>Isthmus cingulate, right</b>       |  | Bipolar            | 7.84 ± (2.577)  |           |          |
|                                       |  | Healthy controls   | 9.26 ± (1.947)  |           |          |
|                                       |  |                    | 5.62            | 1,44      | 0.022    |
|                                       |  | <b>Path Length</b> | <b>F</b>        | <b>df</b> | <b>P</b> |
| <b>Hippocampus, left</b>              |  | Bipolar            | 0.046 ± (0.008) |           |          |
|                                       |  | Healthy controls   | 0.041 ± (0.007) |           |          |
|                                       |  |                    | 12.5            | 1,44      | 0.001    |
| <b>Hippocampus, right</b>             |  | Bipolar            | 0.046 ± (0.008) |           |          |
|                                       |  | Healthy controls   | 0.042 ± (0.007) |           |          |
|                                       |  |                    | 7.72            | 1,44      | 0.008    |
| <b>Caudalanterior cingulate, left</b> |  | Bipolar            | 0.042 ± (0.008) |           |          |
|                                       |  | Healthy controls   | 0.039 ± (0.007) |           |          |
|                                       |  |                    | 4.74            | 1,44      | 0.035    |
| <b>Isthmus cingulate, left</b>        |  | Bipolar            | 0.054 ± (0.009) |           |          |
|                                       |  | Healthy controls   | 0.046 ± (0.009) |           |          |
|                                       |  |                    | 13.37           | 1,44      | 0.001    |

|                                     |  |                  |                 |       |      |        |
|-------------------------------------|--|------------------|-----------------|-------|------|--------|
| <b>Lateral orbitofrontal, left</b>  |  | Bipolar          | 0.048 ± (0.008) |       |      |        |
|                                     |  | Healthy controls | 0.043 ± (0.007) | 10.66 | 1,44 | 0.002  |
| <b>Medial orbitofrontal, left</b>   |  | Bipolar          | 0.047 ± (0.008) |       |      |        |
|                                     |  | Healthy controls | 0.044 ± (0.007) | 6.12  | 1,44 | 0.017  |
| <b>Parahippocampal, left</b>        |  | Bipolar          | 0.109 ± (0.039) |       |      |        |
|                                     |  | Healthy controls | 0.087 ± (0.031) | 5.32  | 1,44 | 0.026  |
| <b>Caudalanterior cingulate,</b>    |  | Bipolar          | 0.041 ± (0.007) |       |      |        |
|                                     |  | Healthy controls | 0.038 ± (0.007) | 4.46  | 1,44 | 0.040  |
| <b>Isthmus cingulate, right</b>     |  | Bipolar          | 0.051 ± (0.008) |       |      |        |
|                                     |  | Healthy controls | 0.042 ± (0.008) | 23.8  | 1,44 | <0.001 |
| <b>Lateral orbitofrontal, right</b> |  | Bipolar          | 0.049 ± (0.008) |       |      |        |
|                                     |  | Healthy controls | 0.045 ± (0.008) | 7.51  | 1,44 | 0.009  |
| <b>Medial orbitofrontal, right</b>  |  | Bipolar          | 0.045 ± (0.007) |       |      |        |
|                                     |  | Healthy controls | 0.042 ± (0.008) | 5.88  | 1,44 | 0.02   |

Table 5. Post-hoc analyses of inter-hemispheric integration in the frontal, temporal, parietal, and occipital lobes. This table shows the mean and standard deviation (SD) of lobar inter-hemispheric path length and efficiency (computed using both connectivity-to-length mappings). Only group differences reaching statistical significance are shown (Bonferroni correction with a total of 16 tests; cut-off p value  $0.05/16=0.003$ )

| <b>Element-wise inverse mapping</b>  |                  |                 | <b>F</b> | <b>df</b> | <b>P</b>               |
|--------------------------------------|------------------|-----------------|----------|-----------|------------------------|
| <b>Inter-hemispheric path length</b> |                  |                 |          |           |                        |
| <b>Occipital lobe</b>                |                  |                 |          |           |                        |
| <hr/>                                |                  |                 |          |           |                        |
|                                      | Bipolar          | 0.054 ± (0.014) |          |           |                        |
|                                      | Healthy controls | 0.044 ± (0.010) |          |           |                        |
|                                      |                  |                 | 10.64    | 1,44      | 0.0021                 |
| <hr/>                                |                  |                 |          |           |                        |
| <b>Inter-hemispheric efficiency</b>  |                  |                 |          |           |                        |
| <b>Frontal lobe</b>                  |                  |                 |          |           |                        |
| <hr/>                                |                  |                 |          |           |                        |
|                                      | Bipolar          | 22.9 ± (4.86)   |          |           |                        |
|                                      | Healthy controls | 27.9 ± (6.26)   |          |           |                        |
|                                      |                  |                 | 17.29    | 1,44      | 1.5 × 10 <sup>-4</sup> |
| <hr/>                                |                  |                 |          |           |                        |
| <b>Inter-hemispheric efficiency</b>  |                  |                 |          |           |                        |
| <b>Temporal lobe</b>                 |                  |                 |          |           |                        |
| <hr/>                                |                  |                 |          |           |                        |
|                                      | Bipolar          | 54.6 ± (17.9)   |          |           |                        |
|                                      | Healthy controls | 71.4 ± (20.3)   |          |           |                        |
|                                      |                  |                 | 11.27    | 1,44      | 0.0016                 |
| <hr/>                                |                  |                 |          |           |                        |
| <b>Inter-hemispheric efficiency</b>  |                  |                 |          |           |                        |
| <b>Occipital lobe</b>                |                  |                 |          |           |                        |
| <hr/>                                |                  |                 |          |           |                        |
|                                      | Bipolar          | 22.9 ± (4.86)   |          |           |                        |
|                                      | Healthy controls | 27.9 ± (6.26)   |          |           |                        |
|                                      |                  |                 | 10.38    | 1,44      | 0.0024                 |
| <hr/>                                |                  |                 |          |           |                        |
| <b>Inter-hemispheric efficiency</b>  |                  |                 |          |           |                        |
| <b>Parietal lobe</b>                 |                  |                 |          |           |                        |
| <hr/>                                |                  |                 |          |           |                        |
|                                      | Bipolar          | 54.6 ± (17.9)   |          |           |                        |
|                                      | Healthy controls | 71.4 ± (20.3)   |          |           |                        |
|                                      |                  |                 | 9.87     | 1,44      | 0.0030                 |

| Element-wise inverse square root mapping        |                  | <i>F</i>       | <i>df</i> | <i>P</i>               |
|-------------------------------------------------|------------------|----------------|-----------|------------------------|
| Inter-hemispheric path length<br>Frontal lobe   |                  |                |           |                        |
|                                                 | Bipolar          | 0.40 ± (0.044) |           |                        |
|                                                 | Healthy controls | 0.37 ± (0.037) |           |                        |
|                                                 |                  |                | 12.20     | 1,44                   |
|                                                 |                  |                |           | 0.0011                 |
| Inter-hemispheric path length<br>Occipital lobe |                  |                |           |                        |
|                                                 | Bipolar          | 0.36 ± (0.055) |           |                        |
|                                                 | Healthy controls | 0.32 ± (0.040) |           |                        |
|                                                 |                  |                | 10.66     | 1,44                   |
|                                                 |                  |                |           | 0.0021                 |
| Inter-hemispheric Efficiency<br>Frontal lobe    |                  |                |           |                        |
|                                                 | Bipolar          | 3.49 ± (0.46)  |           |                        |
|                                                 | Healthy controls | 3.86 ± (0.37)  |           |                        |
|                                                 |                  |                | 15.62     | 1,44                   |
|                                                 |                  |                |           | 2.8 × 10 <sup>-4</sup> |
| Inter-hemispheric Efficiency<br>Temporal lobe   |                  |                |           |                        |
|                                                 | Bipolar          | 1.60 ± (0.17)  |           |                        |
|                                                 | Healthy controls | 1.73 ± (0.21)  |           |                        |
|                                                 |                  |                | 11.79     | 1,44                   |
|                                                 |                  |                |           | 0.0013                 |

Figure 1  
[Click here to download high resolution image](#)

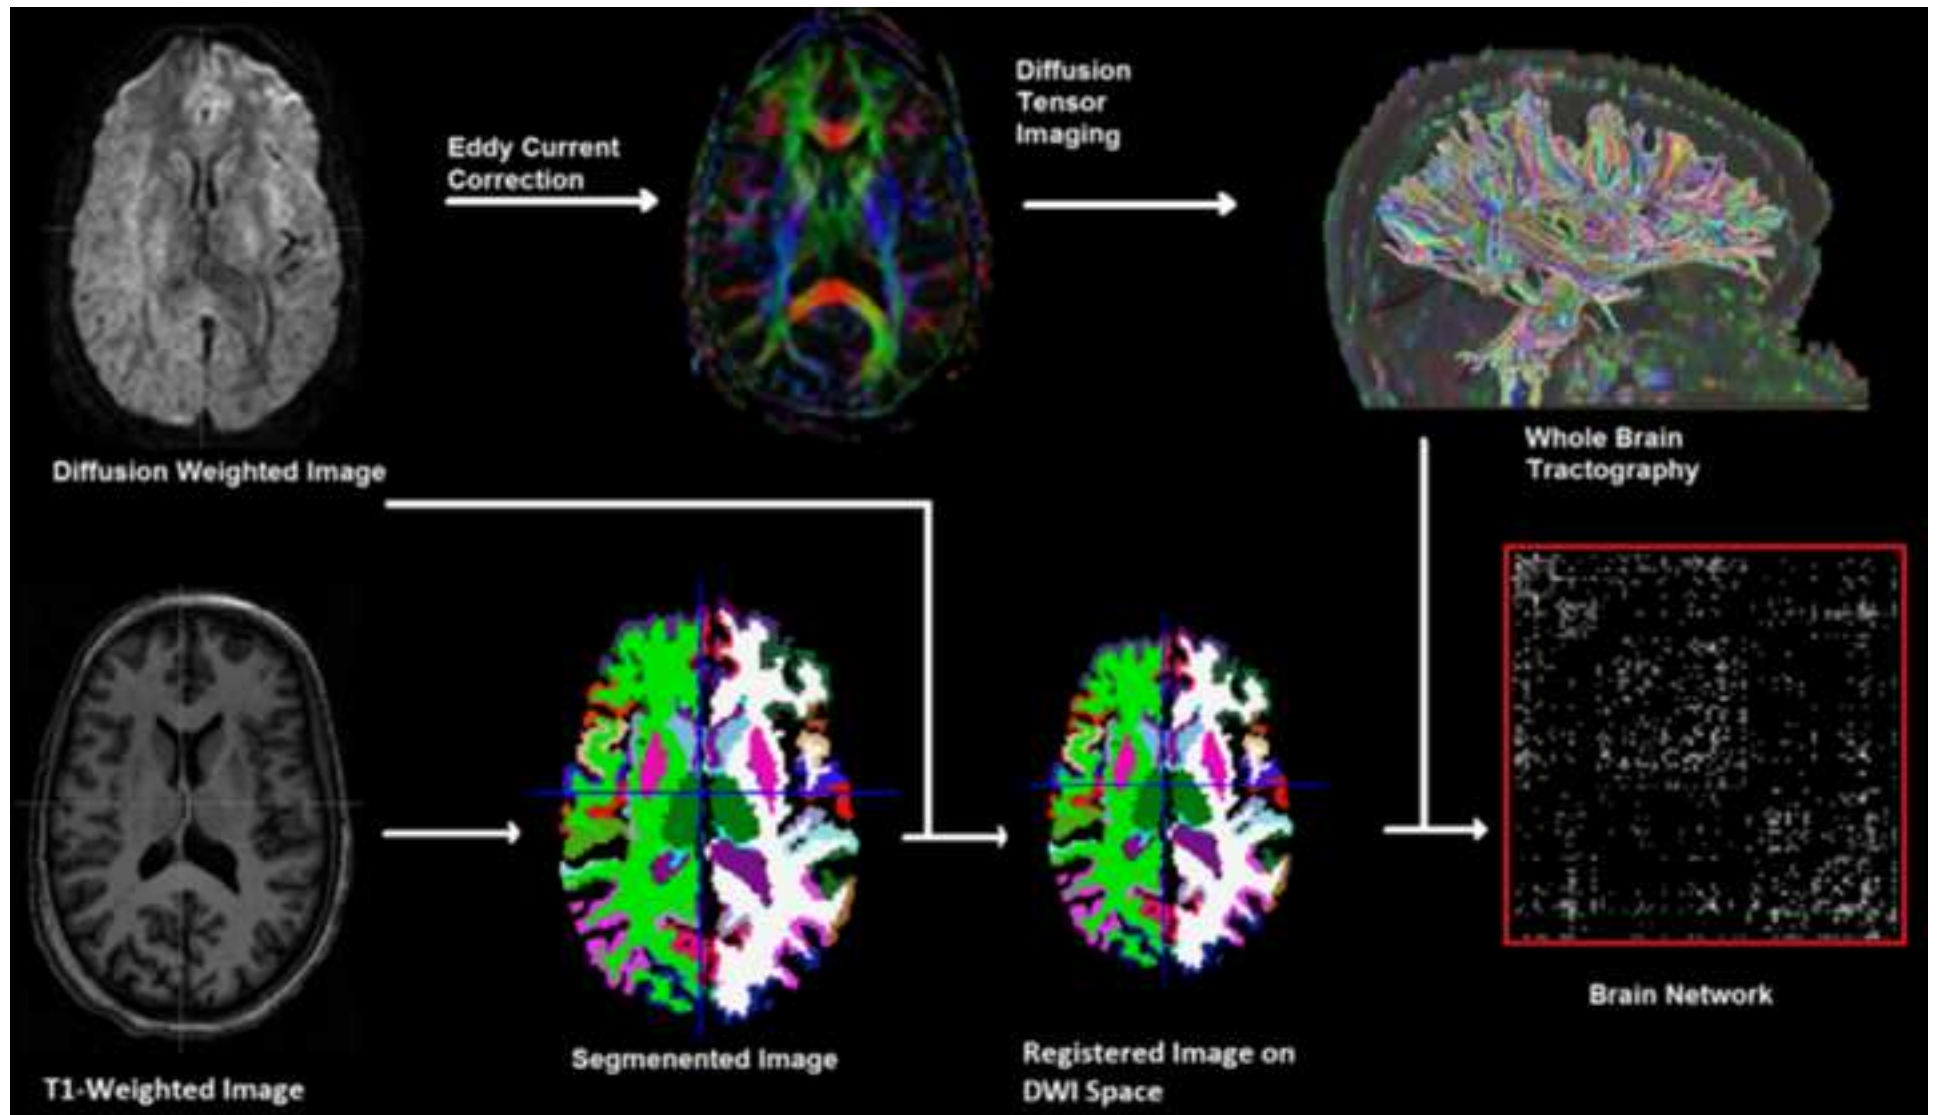



Figure 2  
[Click here to download high resolution image](#)

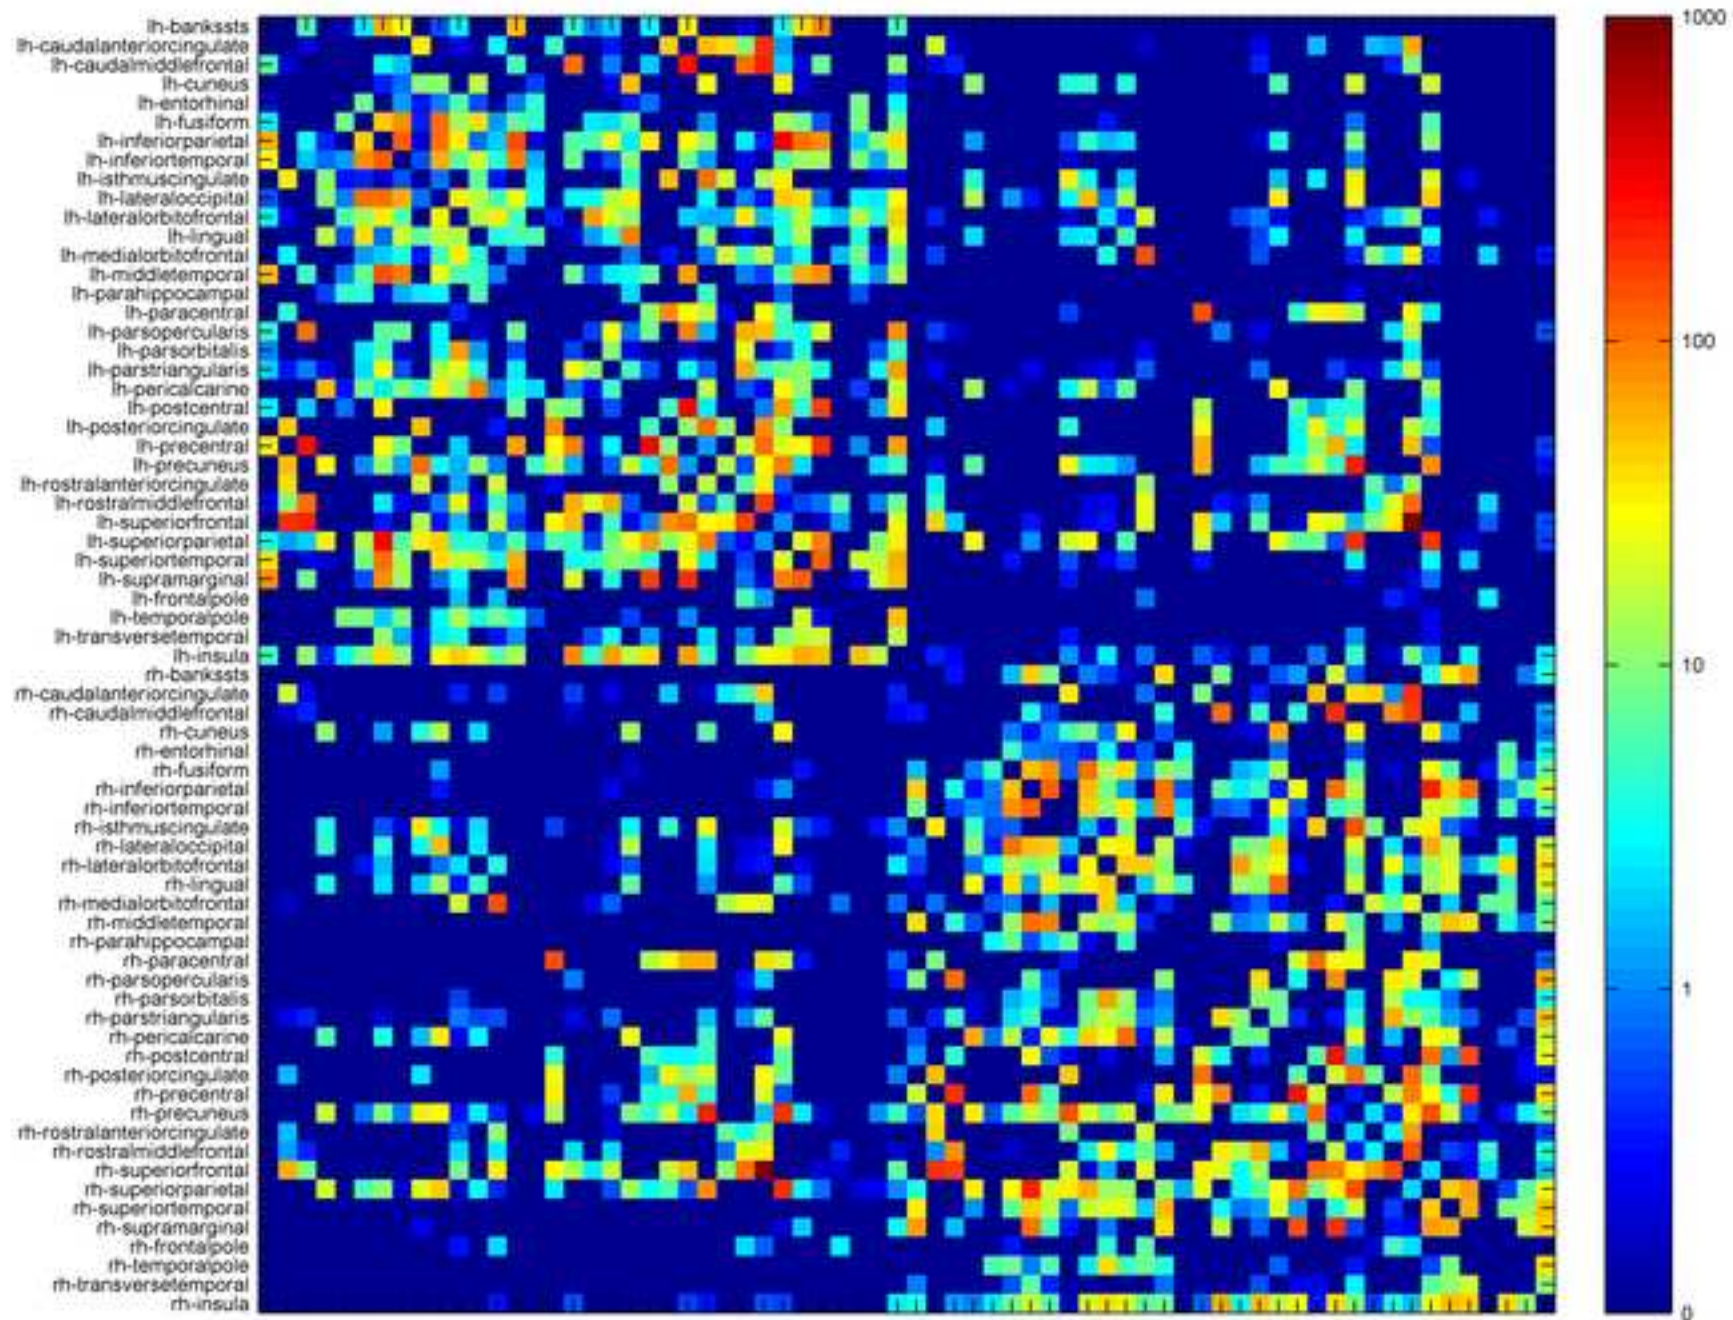

Figure 3  
[Click here to download high resolution image](#)

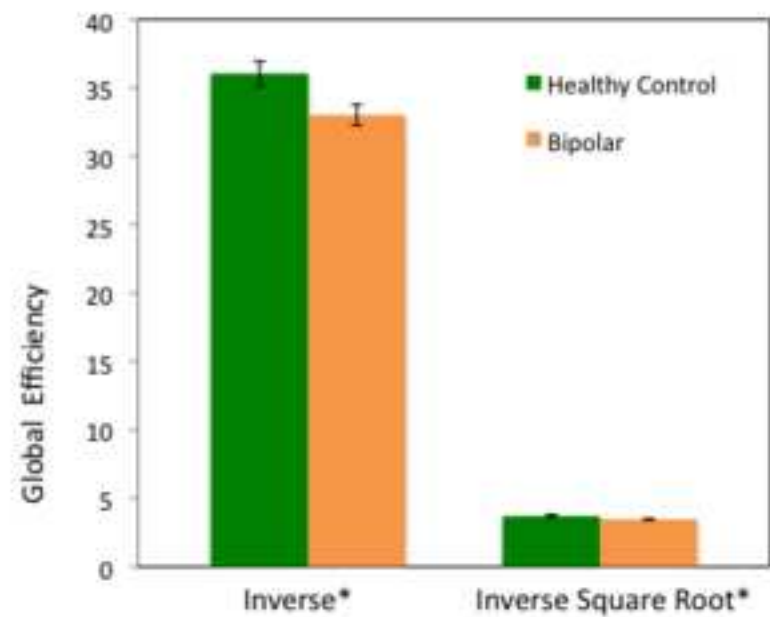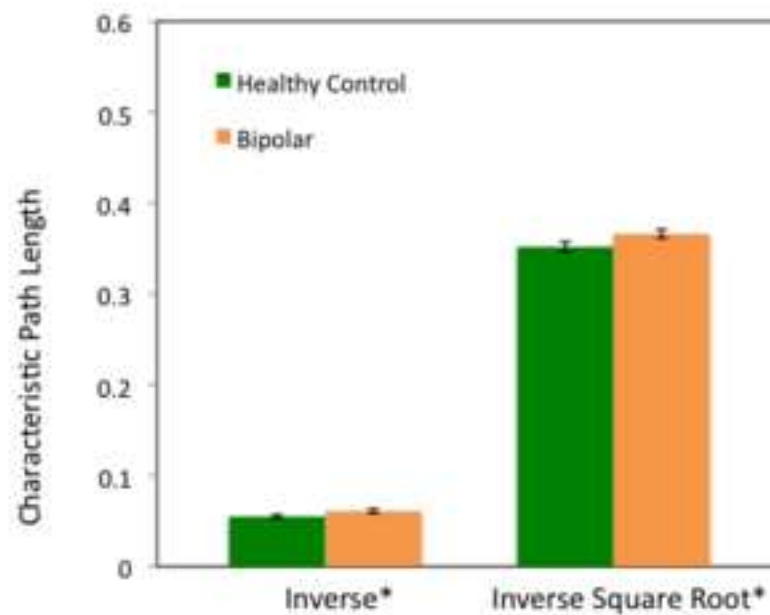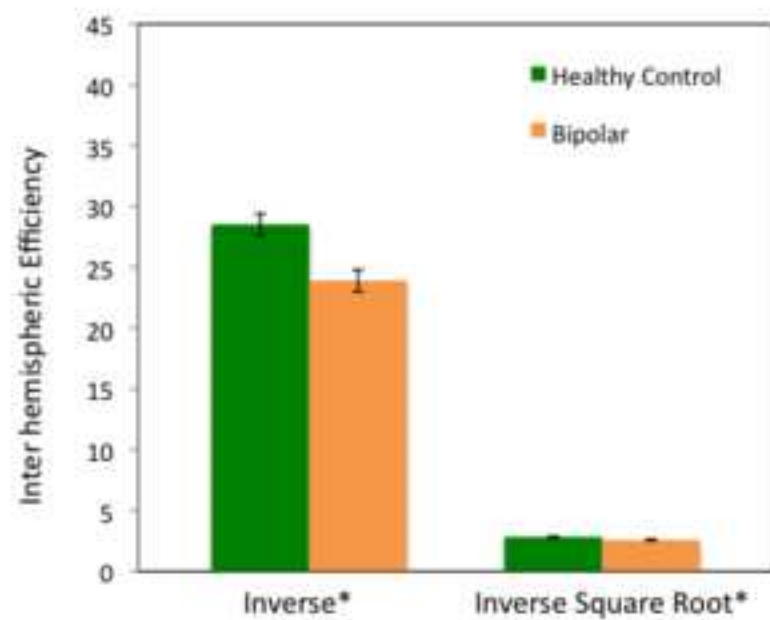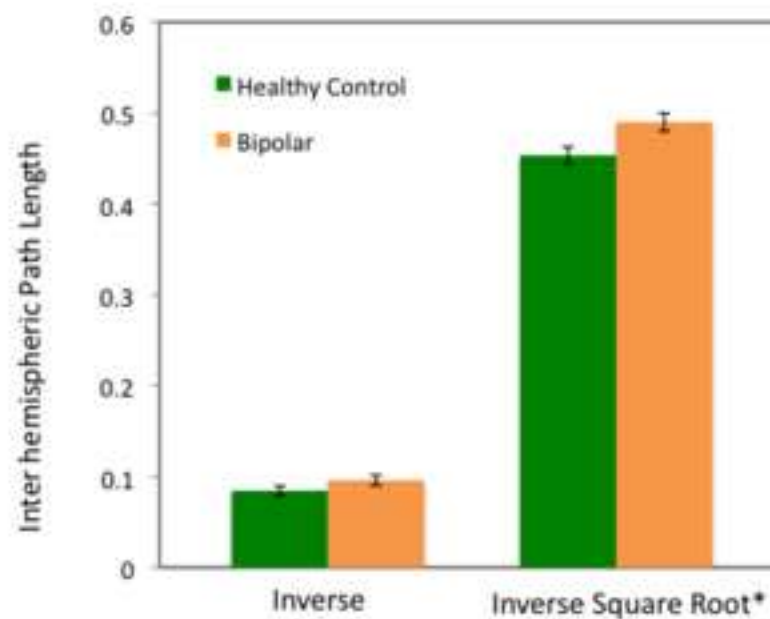

Mathematically, the characteristic path length and global efficiency (CPL and  $E_{\text{glob}}$ ) are defined as:

$$CPL = \frac{\sum_{n, m \in N; n \neq m} d_{nm}}{\{N\}^2 - \{N\}}$$

$$E_{\text{glob}} = \frac{\sum_{n, m \in N; n \neq m} d_{nm}^{-1}}{\{N\}^2 - \{N\}}$$

Here,  $N$  denotes the whole network,  $\{N\}$  the number of nodes in the whole network, and  $d_{nm}$  the length of the shortest path connecting nodes  $n$  and  $m$ .

For the proposed metrics, we defined the intra-modular path length (intra-PL) for module  $M_i$  as:

$$\text{intra-PL}^{M_i} = \frac{\sum_{n, m \in M_i; n \neq m} d_{nm}}{\{M_i\}^2 - \{M_i\}}$$

Here  $\{M_i\}$  denotes the number of nodes in module  $M_i$ . Similarly, the inter-modular path length (inter-PL) between modules  $M_i$  and  $M_j$  is mathematically defined as:

$$\text{inter-PL}^{M_i \leftrightarrow M_j} = \frac{\sum_{n \in M_i; m \in M_j} d_{nm}}{\{M_i\}\{M_j\}}$$

Lastly, the intra-modular and inter-modular efficiency ( $E_{\text{intra}}$  and  $E_{\text{inter}}$ ) are mathematically defined as follows.

$$E_{\text{intra}}^{M_i} = \frac{\sum_{n, m \in M_i; n \neq m} d_{nm}^{-1}}{\{M_i\}^2 - \{M_i\}}$$

$$E_{\text{inter}}^{M_i \leftrightarrow M_j} = \frac{\sum_{n \in M_i; m \in M_j} d_{nm}^{-1}}{\{M_i\}\{M_j\}}$$

Supplemental Figure and Table (will be made online)

Figure S

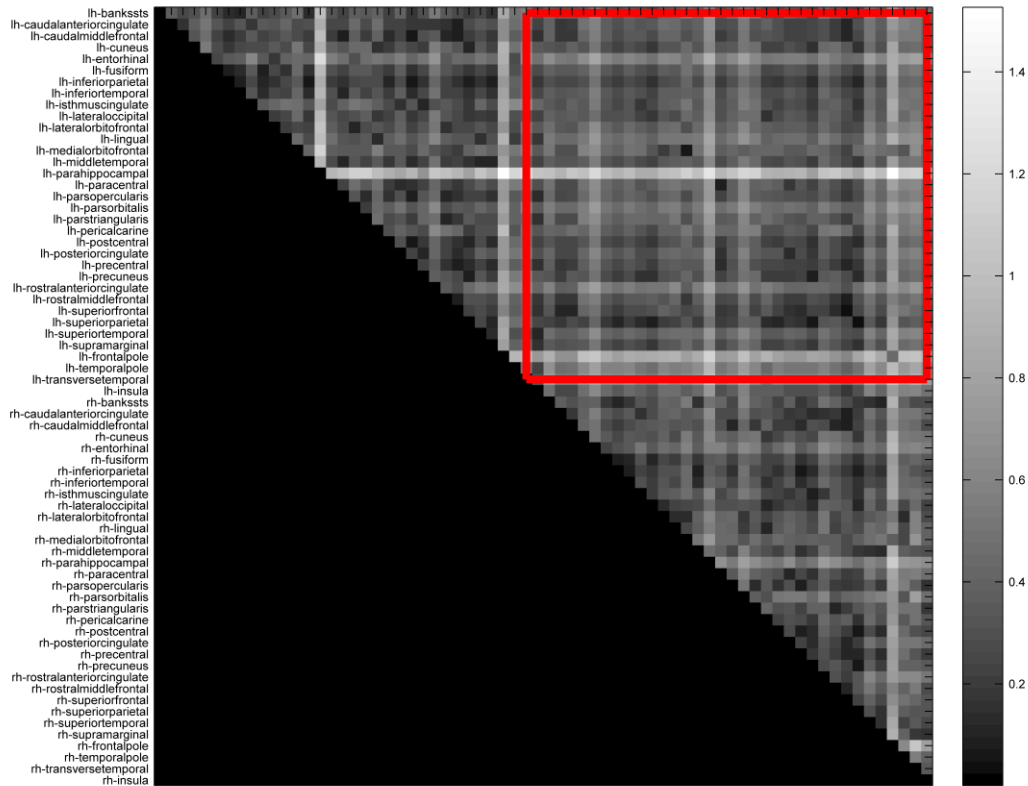

**Figure S** The brain network distance matrix from a normal control subject in this study. The elements of this matrix indicate the shortest weighted path length connecting node pairs. Only the upper-diagonal part is shown, as the matrix is symmetrical. In this example, the element-wise inverse of the element-wise square root mapping is used. The prefix lh and rh indicate nodes in the left and right hemispheres, respectively. The area outlined in red denotes inter-hemispheric connections.

Table S. Mean and standard deviation (SD) of node-level path lengths for the 20 fronto-limbic ROIs proposed in our a priori hypotheses. Here, node-level path length was computed using the element-wise inverse square root connectivity-to-length mapping. Only regions reaching statistical significance (uncorrected) are shown.

|                                    |                  | <b>Path Length</b> | <b>F</b> | <b>df</b> | <b>P</b> |
|------------------------------------|------------------|--------------------|----------|-----------|----------|
| <b>Hippocampus, left</b>           |                  |                    |          |           |          |
|                                    | Bipolar          | 0.32 ± (0.025)     |          |           |          |
|                                    | Healthy controls | 0.30 ± (0.028)     |          |           |          |
|                                    |                  |                    | 7.926    | 1,44      | 0.007    |
| <b>Isthmus cingulate, left</b>     |                  |                    |          |           |          |
|                                    | Bipolar          | 0.38 ± (0.032)     |          |           |          |
|                                    | Healthy controls | 0.35 ± (0.043)     |          |           |          |
|                                    |                  |                    | 5.467    | 1,44      | 0.024    |
| <b>Lateral orbitofrontal, left</b> |                  |                    |          |           |          |
|                                    | Bipolar          | 0.33 ± (0.025)     |          |           |          |
|                                    | Healthy controls | 0.32 ± (0.026)     |          |           |          |
|                                    |                  |                    | 13.117   | 1,44      | 0.001    |
| <b>Parahippocampal, left</b>       |                  |                    |          |           |          |
|                                    | Bipolar          | 0.55 ± (0.074)     |          |           |          |
|                                    | Healthy controls | 0.49 ± (0.069)     |          |           |          |
|                                    |                  |                    | 7.979    | 1,44      | 0.007    |
| <b>Hippocampus, right</b>          |                  |                    |          |           |          |
|                                    | Bipolar          | 0.32 ± (0.026)     |          |           |          |
|                                    | Healthy controls | 0.31 ± (0.028)     |          |           |          |
|                                    |                  |                    | 4.717    | 1,44      | 0.035    |
| <b>Medial orbitofrontal, right</b> |                  |                    |          |           |          |
|                                    | Bipolar          | 0.37 ± (0.043)     |          |           |          |
|                                    | Healthy controls | 0.35 ± (0.029)     |          |           |          |
|                                    |                  |                    | 8.911    | 1,44      | 0.005    |
| <b>Isthmus cingulate, right</b>    |                  |                    |          |           |          |
|                                    | Bipolar          | 0.34 ± (0.024)     |          |           |          |
|                                    | Healthy controls | 0.32 ± (0.035)     |          |           |          |
|                                    |                  |                    | 9.176    | 1,44      | 0.004    |

In this issue statement

We acquired diffusion-weighted MRI on 25 bipolar I subjects and 24 gender and age equivalent healthy controls. We investigated white matter integrity in the whole brain, and conducted first ever brain network analyses in bipolar disorder using a graph-theoretical approach.

Our results revealed that bipolar brain networks exhibited lower local clustering and global efficiency relative to those of controls. Further analyses suggested significantly impaired inter-hemispheric integration in the bipolar group.
